# Supplementary material
Source: PubMed Central journal article supplement (PMC2516918)

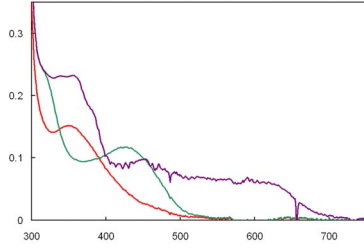

IPP Isomerase-FMNH<sup>-</sup>

IPP Isomerase-FMNH<sub>2</sub>-IPP

IPP Isomerase-FMNH·-IPP

Supplement: NIHMS56515-supplement-3.pdf [file NIHMS56515-supplement-3.pdf]
